# Supplementary material
Source: MDPI journal article supplement (https://www.mdpi.com/2227-9040/10/7/276)
Supplement: s1 [file s1]

# Electronic Supplementary Information (ESI) for Programmable, Universal DNzyme Amplifier Supporting Pancreatic Cancer-Related miRNAs Detection

Kunhan Nie <sup>1,†</sup>, Yongjian Jiang <sup>1,†</sup>, Na Wang <sup>1</sup>, Yajun Wang <sup>1</sup>, Di Li <sup>2</sup>, Lei Zhan <sup>1</sup>, Chengzhi Huang <sup>1</sup> and Chunmei Li <sup>1,\*</sup>

<sup>1</sup> Key Laboratory of Luminescence Analysis and Molecular Sensing (Southwest University), Ministry of Education, College of Pharmaceutical Sciences, Southwest University, Chongqing 400715, China; n17784292276@email.swu.edu.cn (K.N.); jiangyj@email.swu.edu.cn (Y.J.); 15762217807@163.com (N.W.); W522113515@163.com (Y.W.); zhanlei6@swu.edu.cn (L.Z.); chengzhi@swu.edu.cn (C.H.)

<sup>2</sup> Department of pharmacy, The Second Affiliated Hospital of Chongqing Medical University, Chongqing 400010, China; 303495@hospital.cqmu.edu.cn (D.L.)

\* Correspondence: licm1024@swu.edu.cn; Tel.: +86-2368254059; Fax: +86-2368367257

† These authors contributed equally to this work.

**Table S1.** The DNA/RNA sequences information (Note: \_ represents mismatch bases).

| Names         | Sequence (from 5' to 3')                             |
|---------------|------------------------------------------------------|
| substrate-10b | BHQ1-CACTAT/rA/GGAAGAGAT-FAM                         |
| DNzyme-10b    | TAGAACCGAATTT-<br>GTGTCTCTTCTCCGAGCCGGTCGAAATAGT     |
| blocker-10b   | AAGAGACACAAATTCGGTTCTACAGGGTA                        |
| DNA-10b       | TACCCTGTAGAACCGAATTTGTG                              |
| miR-10b       | UACCCUGUAGAACCGAAUUUGUG                              |
| mis-1-10b     | TACA <u>CT</u> GTAGAACCGAATTTGTG                     |
| mis-2-10b     | TACA <u>AT</u> GTAGAACCGAATTTGTG                     |
| mis-3-10b     | TACA <u>AT</u> GTAGAAGCGAATTTGTG                     |
| mis-4-10b     | TACA <u>AT</u> GTAGAAGCTAATTTGTG                     |
| substrate-21  | BHQ1-AAGCTACAG/rAU/GTCCGATACAGCACT-FAM               |
| DNzyme-21     | AGTGCTGTATCGGACAGGCTAGCTACAACGACTG-<br>TAGCTTATCAGAC |
| blocker-21    | TCAACATCAGTCTGATAAGCTACAGATGTCCGATACAG-<br>CACT      |
| miR-21        | UAGCUUAUCAGACUGAUGUUGA                               |
| mis-1-21      | TAGCTTATCAGACTGAT <u>CT</u> TGA                      |
| mis-2-21      | TAGCTTATCAGAC <u>AG</u> AT <u>CT</u> TGA             |
| mis-3-21      | TAGCTT <u>TT</u> CAGAC <u>AG</u> AT <u>CT</u> TGA    |
| mis-4-21      | TAGCTT <u>TT</u> CAC <u>AC</u> AGAT <u>CT</u> TGA    |

**Table S2.** Comparison of miR-10b detection between this work and other strategies.

| Probe         | Methods      | Detection limit | Reaction time | Reference |
|---------------|--------------|-----------------|---------------|-----------|
| Gold Nanotags | LSPR         | 0.002 nM        | 60 min        | 14        |
| SGNP-MBs      | Fluorescence | 0.01 nM         | 60 min        | 17        |
| nGO-PEGMA     | Fluorescence | 0.86 nM         | 90 min        | 24        |
| miRNA-RISC    | Fluorescence | 13.4 nM         | 120 min       | 25        |
| Dzm/blocker   | Fluorescence | 0.89 nM         | 15 min        | This work |

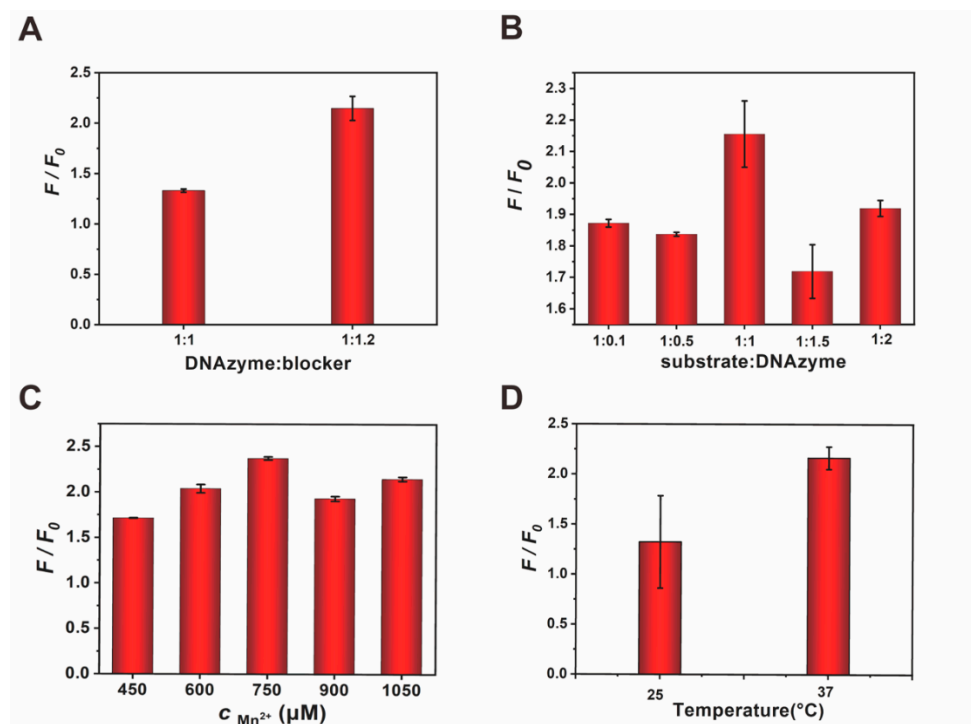

**Figure S1.** Optimization of experimental conditions for miR-21 detection. **(A)** Optimization of the ratio between DNAzyme and blocker. **(B)** Optimization of the ratio between substrate DNA and DNAzyme. **(C)** Optimization of  $Mn^{2+}$  concentration. **(D)** Optimization of temperature for miR-21 detection (Error bars represented the standard deviation of three determinations).
